# Supplementary material for: Transcriptional Changes Associated with Long-Term Left Ventricle Volume Overload in Rats: Impact on Enzymes Related to Myocardial Energy Metabolism
Source: Hindawi journal article supplement (doi:10.1155/2015/949624), 2015-01-01
Supplement: f1 [file 949624.f1.pdf]

## Data supplement

Transcriptional changes associated with long-term left ventricle volume overload in rats: impact on enzymes related to myocardial energy metabolism.

Elise Roussel, Marie-Claude Drolet, Elisabeth Walsh-Wilkinson, Wahiba Dhahri, Dominic Lachance, Suzanne Gascon\*, Otman Sarrhini\*, Jacques A. Rousseau\*, Roger Lecomte\*, Jacques Couet and Marie Arsenault.

Groupe de recherche sur les valvulopathies, Centre de Recherche, Institut universitaire de cardiologie et de pneumologie de Québec, Université Laval, Quebec City, Canada.

\*: Centre d'imagerie moléculaire de Sherbrooke, Centre de recherché Étienne-LeBel, Centre Hospitalier Universitaire de Sherbrooke, Université de Sherbrooke, Sherbrooke, Canada.

Corresponding authors: Jacques Couet PhD and Marie Arsenault MD

Groupe de Recherche en Valvulopathies, Centre de Recherche, Institut universitaire de cardiologie et de pneumologie de Québec  
2725, Chemin Sainte-Foy, Québec, (Québec), Canada, G1V 4G5

Phone: 1-418-656-4760; Fax: 1-418-656-4509

Email: [jacques.couet@med.ulaval.ca](mailto:jacques.couet@med.ulaval.ca) or [marie.arsenault@criucpq.ulaval.ca](mailto:marie.arsenault@criucpq.ulaval.ca)

**Table S1.** Primer Assays used in Q-PCR analysis of gene expression (Figure S1).

| mRNA                                    | Symbol | Cat. No.   | Amplicon (bp) |
|-----------------------------------------|--------|------------|---------------|
| Connective tissue growth factor         | Ctgf   | QT00182021 | 102           |
| Cathepsin K                             | Ctsk   | QT00375599 | 80            |
| Fibronectin 1                           | Fn1    | QT00179333 | 92            |
| Follistatin-like 1                      | Fstl1  | QT00195762 | 131           |
| Hepcidin antimicrobial peptide          | Hamp   | QT00372876 | 120           |
| Integrin beta 1                         | Itgb1  | QT00187656 | 117           |
| Natriuretic peptide precursor type A    | Nppa   | QT00366170 | 94            |
| Natriuretic peptide precursor type B    | Nppb   | QT00183225 | 89            |
| Peripheral myelin protein 22            | Pmp22  | QT00175938 | 89            |
| Transforming growth factor beta 2       | Tgfb2  | QT00187320 | 139           |
| Tissue inhibitor of metalloproteinase 1 | Timp1  | QT00185304 | 113           |

**Table S2.** Significant up-regulated gene categories based on gene ontology annotation system.

| System                | Gene Category                                | No. of genes | EASE score <sup>a</sup> |
|-----------------------|----------------------------------------------|--------------|-------------------------|
| GO Biological Process | regulation of cell cycle                     | 16           | 4.29E-04                |
| GO Biological Process | cell growth                                  | 9            | 5.59E-04                |
| GO Biological Process | transition metal ion homeostasis             | 5            | 6.27E-04                |
| GO Biological Process | di-, tri-valent inorganic cation homeostasis | 7            | 7.50E-04                |
| GO Biological Process | response to biotic stimulus                  | 23           | 8.05E-04                |
|                       |                                              |              |                         |
| GO Molecular Function | calcium ion binding                          | 25           | 6.90E-06                |
| GO Molecular Function | metal ion binding                            | 36           | 8.01E-05                |
| GO Molecular Function | cell adhesion molecule activity              | 15           | 2.11E-04                |
| GO Molecular Function | calcium-dependent phospholipid binding       | 5            | 6.74E-04                |
|                       |                                              |              |                         |
| GO Cellular Component | extracellular                                | 70           | 2.70E-11                |
| GO Cellular Component | extracellular matrix                         | 22           | 6.04E-08                |
| GO Cellular Component | extracellular space                          | 42           | 3.80E-06                |

a: Ease Probability score. E: exponent, power of 10.

**Table S3.** Significant down-regulated gene categories based on gene ontology annotation system.

| System                | Gene Category                                       | No. of genes | EASE score <sup>a</sup> |
|-----------------------|-----------------------------------------------------|--------------|-------------------------|
| GO Biological Process | organic acid metabolism                             | 18           | 2.49E-07                |
| GO Biological Process | carboxylic acid metabolism                          | 18           | 2.49E-07                |
| GO Biological Process | fatty acid metabolism                               | 11           | 4.64E-06                |
| GO Biological Process | energy derivation by oxidation of organic compounds | 10           | 2.75E-05                |
| GO Biological Process | energy pathways                                     | 11           | 2.89E-05                |
|                       |                                                     |              |                         |
| GO Molecular Function | oxidoreductase activity                             | 26           | 1E-10                   |
| GO Molecular Function | transferase activity                                | 26           | 3.06E-04                |
|                       |                                                     |              |                         |
| GO Cellular Component | mitochondrion                                       | 54           | 4.8E-24                 |

a: Ease Probability score. E: exponent, power of 10.

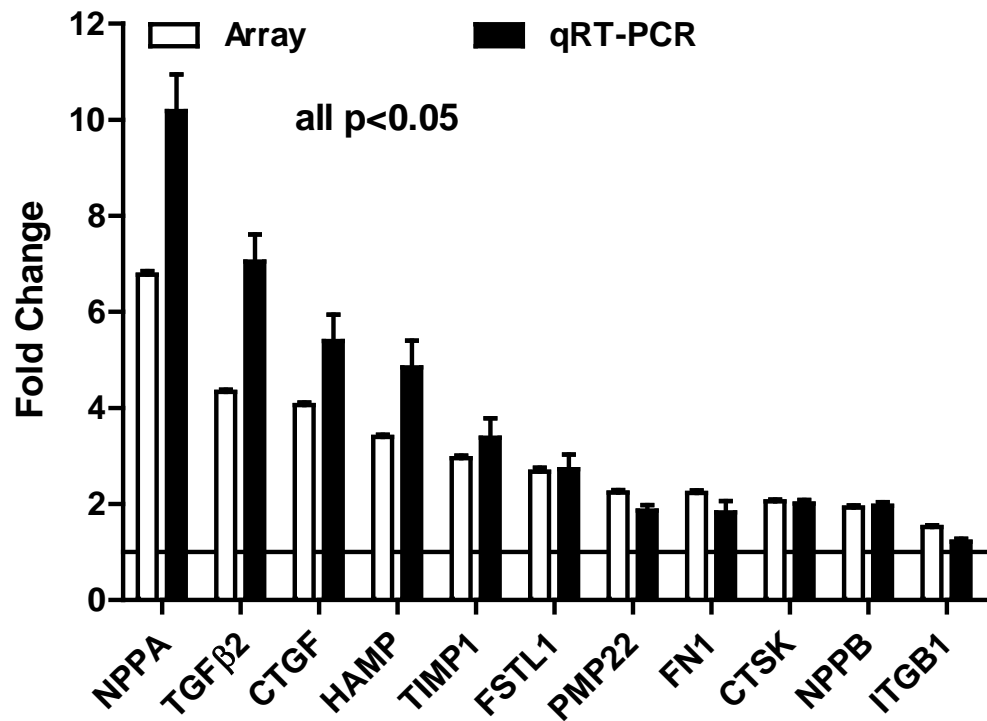

**Figure S1.** Comparison between fold change results obtained from the microarray and by quantitative RT-PCR for a subset of 11 up-regulated genes as determined in the array study. Results are reported in as mean  $\pm$  SEM (n = 5 per group for array and n=6 for qRT-PCR). Levels in sham animals were fixed to 1.

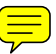

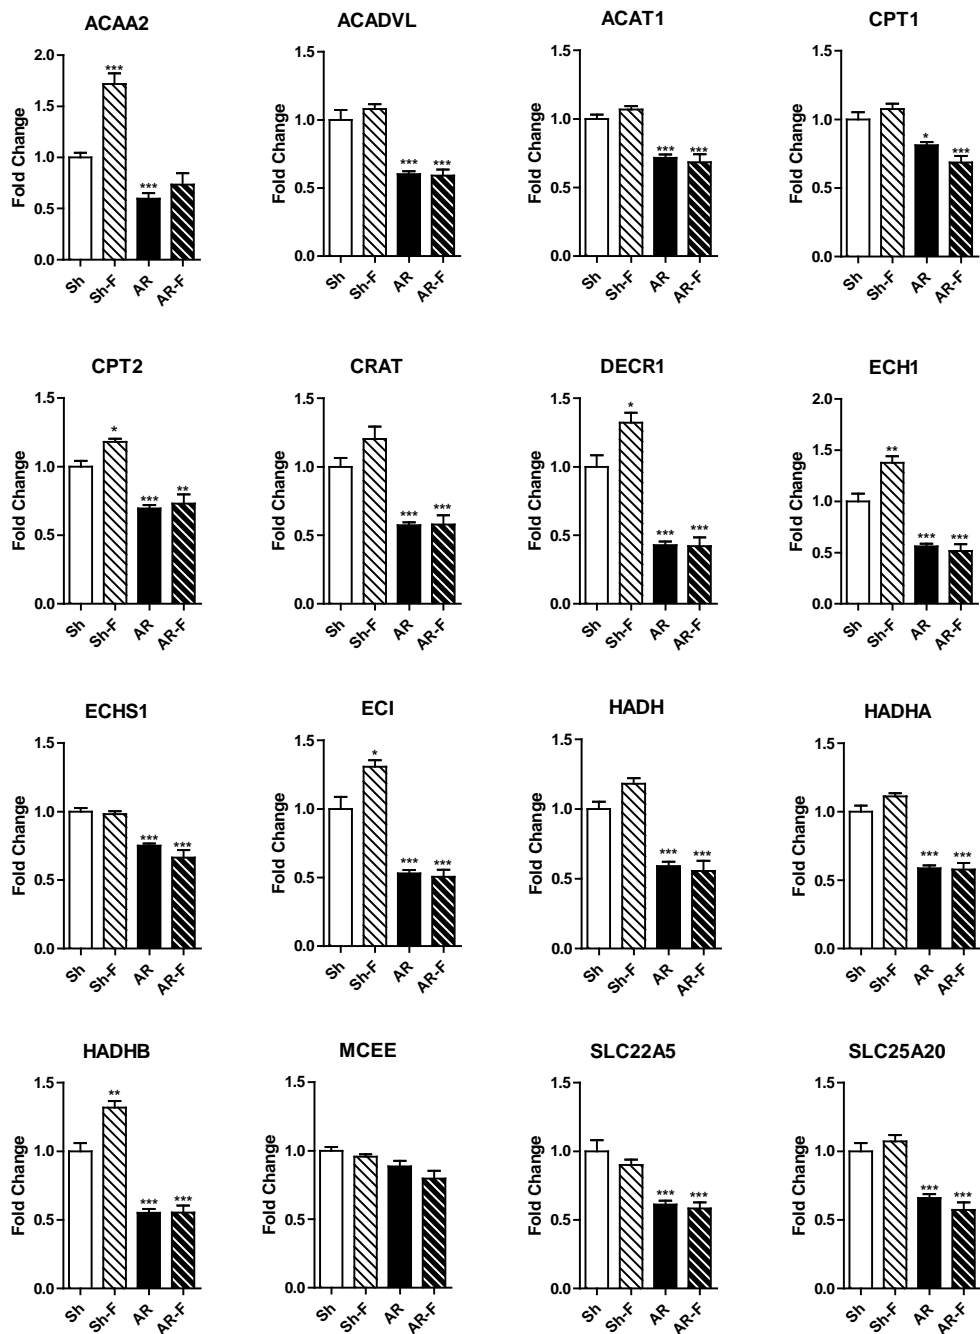

**Figure S2.** Impact of an 8-week fenofibrate (F) treatment on LV expression of 16 FAO genes in Sham (Sh) and AR rats. Levels in sham animals were fixed to 1 (Line). \*:  $p < 0.05$ , \*\*:  $p < 0.01$  and \*\*\*:  $p < 0.001$  vs. untreated sham animals.
